# Supplementary material for: First Generic Teriparatide: Structural and Biological Sameness to Its Reference Medicinal Product
Source: MDPI journal article supplement (doi:10.3390/pharmaceutics16040537), 2024-04-13
Supplement: s1 [file s1]

|        |         |          |          |           |           |           |           |           |           |           |           |           |
|--------|---------|----------|----------|-----------|-----------|-----------|-----------|-----------|-----------|-----------|-----------|-----------|
| SER 1  | HN 7.94 | HA 4.63  | HB2 3.78 | HB3 3.76  |           |           |           |           |           |           |           |           |
| VAL 2  | HN 8.48 | HA 4.01  | HB 1.89  | QG1 0.83  | QG2 0.76  | HG11 0.85 | HG12 0.79 | HG13 0.81 | HG21 0.75 | HG22 0.80 | HG23 0.81 |           |
| SER 3  | HN 8.37 | HA 4.21  | HB2 3.71 | HB3 3.68  |           |           |           |           |           |           |           |           |
| GLU 4  | HN 7.97 | HA 4.04  | HB2 1.88 | HB3 1.84  | HG2 2.15  | HG3 2.11  |           |           |           |           |           |           |
| ILE 5  | HN 7.89 | HA 3.87  | HB 1.64  | HG21 0.72 | HG22 0.69 | HG23 0.65 | HG12 1.30 | HG13 1.00 | HD11 0.67 | HD12 0.69 | HD13 0.67 |           |
| GLN 6  | HN 8.07 | HA 4.01  | HB2 1.69 | HB3 1.69  | HG2 2.18  | HG3 2.19  | HE21 7.42 | HE22 6.84 |           |           |           |           |
| LEU 7  | HN 8.03 | HA 3.99  | HB2 1.44 | HB3 1.46  | HG 1.31   | QD1 0.72  | QD2 0.70  | HD11 0.76 | HD12 0.67 | HD13 0.75 | HD21 0.72 | HD22 0.67 |
| MET 8  | HN 8.24 | HA 4.24  | HB2 1.82 | HB3 1.87  | HG2 2.38  | HG3 2.09  | QE 2.19   | HE1 1.91  | HE2 1.83  | HE3 1.85  |           |           |
| HIS 9  | HN 8.22 | HA 4.42  | HB2 3.07 | HB3 3.05  | HD2 7.05  | HE1 8.40  |           |           |           |           |           |           |
| ASN 10 | HN 8.31 | HA 4.42  | HB2 2.66 | HB3 2.63  | HD21 7.54 | HD22 6.76 |           |           |           |           |           |           |
| LEU 11 | HN 8.11 | HA 4.15  | HB2 1.51 | HB3 1.54  | HG 1.41   | QD1 0.70  | QD2 0.70  | HD11 0.67 | HD12 0.72 | HD13 0.71 | HD21 0.63 | HD22 0.64 |
| GLY 12 | HN 8.21 | HA2 3.65 |          |           |           |           |           |           |           |           |           | HD23 0.69 |
| LYS 13 | HN 7.91 | HA 4.17  | HB2 1.55 | HB3 1.50  | HG2 1.24  | HG3 1.13  | HD2 1.40  | HD3 1.47  | HE2 2.81  | HE3 2.79  | H21 7.42  | H22 7.34  |
| HIS 14 | HN 8.42 | HA 4.50  | HB2 3.10 | HB3 2.93  | HD2 7.13  | HE1 8.39  |           |           |           |           |           |           |
| LEU 15 | HN 8.15 | HA 4.13  | HB2 1.37 | HB3 1.31  | HG 1.28   | QD1 0.56  | HD11 0.65 | HD12 0.63 | HD13 0.66 | HD21 0.59 | HD22 0.63 | HD23 0.59 |
| ASN 16 | HN 8.61 | HA 4.58  | HB2 2.77 | HB3 2.72  | HD21 7.48 | HD22 6.77 |           |           |           |           |           |           |
| SER 17 | HN 8.25 | HA 4.22  | HB2 3.82 | HB3 3.65  |           |           |           |           |           |           |           |           |
| MET 18 | HN 8.24 | HA 4.25  | HB2 1.94 | HB3 1.94  | HG2 2.44  | HG3 2.45  | QE 1.83   | HE1 1.86  | HE2 1.82  | HE3 1.84  |           |           |
| GLU 19 | HN 8.05 | HA 4.18  | HB2 1.85 | HB3 1.79  | HG2 2.41  | HG3 2.27  |           |           |           |           |           |           |
| ARG 20 | HN 8.20 | HA 4.02  | HB2 1.73 | HB3 1.57  | HG2 1.43  | HG3 1.39  | HD2 2.95  | HD3 2.97  | HE 7.10   |           |           |           |
| VAL 21 | HN 7.81 | HA 3.69  | HB 1.92  | QG1 0.87  | QG2 0.68  | HG11 0.79 | HG12 0.77 | HG13 0.76 | HG21 0.71 | HG22 0.69 | HG23 0.67 |           |
| GLU 22 | HN 8.13 | HA 4.00  | HB2 1.83 | HB3 1.88  | HG2 2.10  | HG3 2.19  |           |           |           |           |           |           |
| TRP 23 | HN 7.98 | HA 4.22  | HB2 3.19 | HB3 3.12  | HD1 7.05  | HE3 7.41  | HE1 9.98  | H23 6.95  | H22 7.26  | HH2 7.01  |           |           |
| LEU 24 | HN 7.94 | HA 3.81  | HB2 1.49 | HB3 1.51  | HG 1.36   | QD1 0.70  | QD2 0.69  | HD11 0.73 | HD12 0.67 | HD13 0.73 | HD21 0.64 | HD22 0.63 |
| ARG 25 | HN 7.76 | HA 3.88  | HB2 1.65 | HB3 1.67  | HG2 1.47  | HG3 1.39  | HD2 2.95  | HD3 2.93  | HE 7.21   |           |           |           |
| LYS 26 | HN 7.91 | HA 3.90  | HB2 1.45 | HB3 1.10  | HG2 1.38  | HG3 1.87  | HD2 1.22  | HD3 1.15  | HE2 2.76  | HE3 2.64  | H21 7.33  | H22 7.34  |
| LYS 27 | HN 7.84 | HA 3.90  | HB2 1.42 | HB3 1.55  | HG2 1.18  | HG3 1.15  | HD2 1.28  | HD3 1.26  | HE2 2.64  | HE3 2.43  | H21 7.36  | H22 7.39  |
| LEU 28 | HN 7.90 | HA 4.09  | HB2 1.50 | HB3 1.41  | HG 1.37   | QD1 0.68  | QD2 0.67  | HD11 0.65 | HD12 0.71 | HD13 0.67 | HD21 0.66 | HD22 0.65 |
| GLN 29 | HN 7.92 | HA 4.02  | HB2 1.86 | HB3 1.85  | HG2 2.21  | HG3 2.13  | HE21 7.02 | HE22 6.79 |           |           |           | HD23 0.66 |
| ASP 30 | HN 8.08 | HA 4.45  | HB2 2.58 | HB3 2.46  |           |           |           |           |           |           |           |           |
| VAL 31 | HN 7.76 | HA 3.83  | HB 1.86  | QG1 0.61  | HG11 0.70 | HG12 0.61 | HG13 0.66 | HG21 0.63 | HG22 0.61 | HG23 0.65 |           |           |
| HIS 32 | HN 8.44 | HA 4.46  | HB2 2.95 | HB3 2.84  | HD2 6.96  | HE1 8.38  |           |           |           |           |           |           |
| ASN 33 | HN 8.17 | HA 4.51  | HB2 2.54 | HB3 2.46  | HD21 7.30 |           |           |           |           |           |           |           |
| PHE 34 | HN 7.60 | HA 4.71  | HB2 2.93 | HB3 2.78  |           |           |           |           |           |           |           |           |

(a)

|        |         |          |          |           |           |           |           |           |           |           |           |           |
|--------|---------|----------|----------|-----------|-----------|-----------|-----------|-----------|-----------|-----------|-----------|-----------|
| SER 1  | HN 7.89 | HA 4.60  | HB2 3.77 | HB3 3.83  |           |           |           |           |           |           |           |           |
| VAL 2  | HN 8.50 | HA 4.06  | HB 1.87  | QG1 0.82  | QG2 0.80  | HG11 0.85 | HG12 0.75 | HG13 0.78 | HG21 0.80 | HG22 0.78 | HG23 0.74 |           |
| SER 3  | HN 8.32 | HA 4.23  | HB2 3.71 | HB3 3.70  |           |           |           |           |           |           |           |           |
| GLU 4  | HN 7.97 | HA 4.11  | HB2 1.95 | HB3 1.85  | HG2 2.23  | HG3 2.06  |           |           |           |           |           |           |
| ILE 5  | HN 7.96 | HA 3.80  | HB 1.69  | HG21 0.73 | HG22 0.70 | HG23 0.71 | HG12 1.33 | HG13 1.04 | HD11 0.66 | HD12 0.65 | HD13 0.74 |           |
| GLN 6  | HN 8.07 | HA 4.08  | HB2 1.64 | HB3 1.68  | HG2 2.23  | HG3 2.17  | HE21 7.35 | HE22 6.83 |           |           |           |           |
| LEU 7  | HN 7.99 | HA 3.96  | HB2 1.49 | HB3 1.49  | HG 1.32   | QD1 0.70  | QD2 0.72  | HD11 0.67 | HD12 0.66 | HD13 0.69 | HD21 0.65 | HD22 0.69 |
| MET 8  | HN 8.25 | HA 4.27  | HB2 1.89 | HB3 1.81  | HG2 2.40  | HG3 2.09  | QE 2.20   | HE1 1.97  | HE2 1.88  | HE3 1.89  |           | HD23 0.71 |
| HIS 9  | HN 8.17 | HA 4.45  | HB2 3.09 | HB3 3.00  | HD2 7.09  | HE1 8.38  |           |           |           |           |           |           |
| ASN 10 | HN 8.29 | HA 4.51  | HB2 2.68 | HB3 2.64  | HD21 7.53 | HD22 6.83 |           |           |           |           |           |           |
| LEU 11 | HN 8.07 | HA 4.08  | HB2 1.52 | HB3 1.47  | HG 1.43   | QD1 0.75  | QD2 0.66  | HD11 0.74 | HD12 0.71 | HD13 0.76 | HD21 0.65 | HD22 0.70 |
| GLY 12 | HN 8.21 | HA2 3.64 |          |           |           |           |           |           |           |           |           | HD23 0.67 |
| LYS 13 | HN 7.83 | HA 4.13  | HB2 1.48 | HB3 1.53  | HG2 1.17  | HG3 1.17  | HD2 1.47  | HD3 1.46  | HE2 2.80  | HE3 2.75  | H21 7.45  | H22 7.36  |
| HIS 14 | HN 8.42 | HA 4.46  | HB2 3.02 | HB3 2.95  | HD2 7.05  | HE1 8.42  |           |           |           |           |           |           |
| LEU 15 | HN 8.17 | HA 4.21  | HB2 1.43 | HB3 1.32  | HG 1.34   | QD1 0.65  | HD11 0.65 | HD12 0.62 | HD13 0.68 | HD21 0.65 | HD22 0.66 | HD23 0.64 |
| ASN 16 | HN 8.58 | HA 4.49  | HB2 2.71 | HB3 2.67  | HD21 7.50 | HD22 6.85 |           |           |           |           |           |           |
| SER 17 | HN 8.20 | HA 4.24  | HB2 3.80 | HB3 3.75  |           |           |           |           |           |           |           |           |
| MET 18 | HN 8.16 | HA 4.30  | HB2 1.92 | HB3 1.86  | HG2 2.50  | HG3 2.45  | QE 1.88   | HE1 1.89  | HE2 1.86  | HE3 1.91  |           |           |
| GLU 19 | HN 8.04 | HA 4.10  | HB2 1.88 | HB3 1.85  | HG2 2.41  | HG3 2.31  |           |           |           |           |           |           |
| ARG 20 | HN 8.13 | HA 3.98  | HB2 1.73 | HB3 1.57  | HG2 1.46  | HG3 1.43  | HD2 2.95  | HD3 3.01  | HE 7.04   |           |           |           |
| VAL 21 | HN 7.81 | HA 3.64  | HB 1.96  | QG1 0.79  | QG2 0.68  | HG11 0.86 | HG12 0.74 | HG13 0.83 | HG21 0.73 | HG22 0.63 | HG23 0.64 |           |
| GLU 22 | HN 8.13 | HA 4.01  | HB2 1.88 | HB3 1.85  | HG2 2.10  | HG3 2.15  |           |           |           |           |           |           |
| TRP 23 | HN 8.00 | HA 4.24  | HB2 3.19 | HB3 3.15  | HD1 7.07  | HE3 7.37  | HE1 9.95  | H23 6.94  | H22 7.35  | HH2 6.98  |           |           |
| LEU 24 | HN 7.93 | HA 3.83  | HB2 1.51 | HB3 1.44  | HG 1.33   | QD1 0.74  | QD2 0.65  | HD11 0.72 | HD12 0.70 | HD13 0.71 | HD21 0.68 | HD22 0.68 |
| ARG 25 | HN 7.78 | HA 3.92  | HB2 1.62 | HB3 1.71  | HG2 1.56  | HG3 1.37  | HD2 2.95  | HD3 3.01  | HE 7.25   |           |           | HD23 0.63 |
| LYS 26 | HN 7.84 | HA 3.88  | HB2 1.48 | HB3 1.09  | HG2 1.33  | HG3 1.84  | HD2 1.21  | HD3 1.18  | HE2 2.76  | HE3 2.67  | H21 7.30  | H22 7.33  |
| LYS 27 | HN 7.77 | HA 3.92  | HB2 1.46 | HB3 1.54  | HG2 1.20  | HG3 1.20  | HD2 1.31  | HD3 1.28  | HE2 2.67  | HE3 2.39  | H21 7.42  | H22 7.37  |
| LEU 28 | HN 7.92 | HA 4.09  | HB2 1.45 | HB3 1.49  | HG 1.43   | QD1 0.74  | QD2 0.66  | HD11 0.72 | HD12 0.68 | HD13 0.65 | HD21 0.66 | HD22 0.64 |
| GLN 29 | HN 7.92 | HA 4.00  | HB2 1.92 | HB3 1.88  | HG2 2.22  | HG3 2.05  | HE21 7.07 | HE22 6.85 |           |           |           | HD23 0.64 |
| ASP 30 | HN 8.04 | HA 4.39  | HB2 2.55 | HB3 2.43  |           |           |           |           |           |           |           |           |
| VAL 31 | HN 7.81 | HA 3.86  | HB 1.87  | QG1 0.61  | HG11 0.62 | HG12 0.63 | HG13 0.61 | HG21 0.68 | HG22 0.68 | HG23 0.65 |           |           |
| HIS 32 | HN 8.41 | HA 4.48  | HB2 2.94 | HB3 2.87  | HD2 7.02  | HE1 8.39  |           |           |           |           |           |           |
| ASN 33 | HN 8.19 | HA 4.53  | HB2 2.53 | HB3 2.42  | HD21 7.34 |           |           |           |           |           |           |           |
| PHE 34 | HN 7.59 | HA 4.61  | HB2 2.91 | HB3 2.82  |           |           |           |           |           |           |           |           |

(b)

**Figure S1.** Chemical Shifts for NMR spectra. (a) Teriparatide BGW, Batch #2; (b) RMP, Batch #6. The small differences observed are due to the peak picking software used to generate the peak lists, and they all fall in the error range corresponding to the NMR resolution of 1H frequency.
